# Supplementary material for: Synthesis of monodisperse iron oxide nanocrystals by thermal decomposition of iron carboxylate salts
Source: Royal Society of Chemistry journal article supplement (doi:10.1039/b409601k), 2004-01-01
Supplement: b409601k.pdf [file b409601k.pdf]

## Supplementary Materials

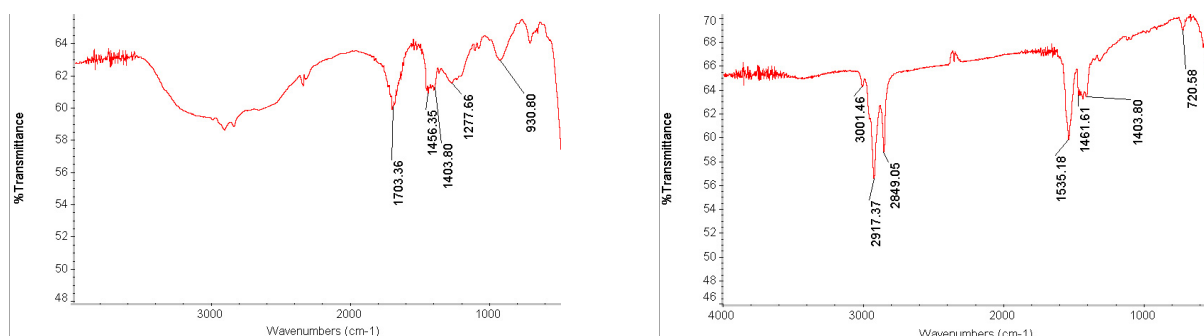

Figure 1 FTIR characterization of oleic acid (left) and iron oleate complex (right)

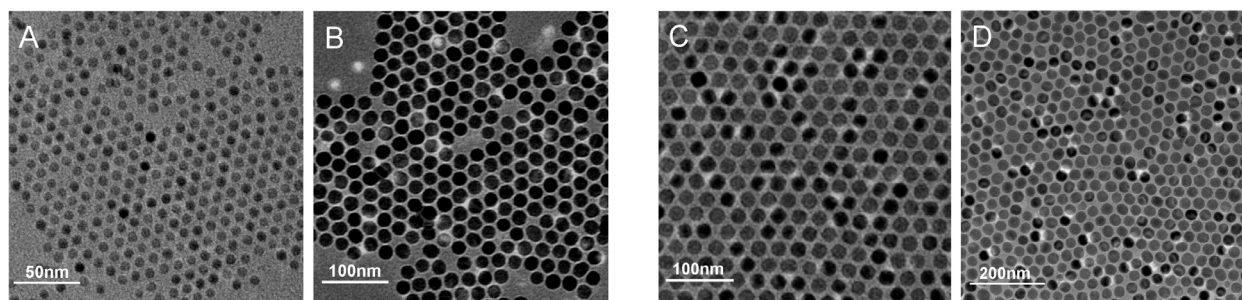

Figure 2 TEM photographs of magnetite nanocrystals with average diameters of 6.4 (A), 19.9 (B), 22.1 (C) and 28.6nm (D)

# Supplementary Material (ESI) for Chemical Communications  
# This journal is © The Royal Society of Chemistry 2004
